# Supplementary material
Source: PubMed Central journal article supplement (PMC4477027)
Supplement: 129supmat-10-1055-s-0034-1390890.pdf [file 129supmat-10-1055-s-0034-1390890.pdf]

## Appendix 1

### Asian EUS Group (AEG) questionnaire on the practice of EUS guided pseudocyst drainage by each endoscopist

#### Demographics

1. What is your country of practice? \_\_\_\_\_
2. What is your specialty?  
 Surgeon  Gastroenterologist  Others \_\_\_\_\_
3. What is your type of practice?  
 Private  Academic
4. What is your year of graduation: \_\_\_\_\_
5. What is your year of specialist registration: \_\_\_\_\_
6. What is your experience in Endoscopy (years): \_\_\_\_\_
7. Do you perform complex endoscopic procedures (ERCP or ESD)?  Yes  No

#### Practices on endoscopic drainage of pseudocyst

Please select the best answer:

1. Do you practice endoscopic drainage of pseudocyst?  
 Yes  No
2. How many cases have you done? \_\_\_\_\_
3. Which endoscopic modality do you prefer to use for drainage of pseudocyst  
a) EGD  
b) EUS  
c) ERCP
4. Do you routinely give antibiotics to patients prior to the procedure?  
 Yes  No
5. How long would you continue antibiotics for in these patients?  
a) 2 more doses  
b) 3 days  
c) 5 days  
d) 1 week  
e) Antibiotics not needed
6. Is ERCP and pancreatic stenting essential prior to pseudocyst drainage?  
a) Yes  
b) No  
c) Only in patients with partial ductal disruption  
d) Only in patients with complete ductal disruption
7. How would you select the site of drainage?  
(more than one answer is permitted)  
 Transgastric drainage preferred  
 Transduodenal drainage preferred  
 Transesophageal drainage preferred  
 Minimal thickness of intervening tissue  
 Avoidance of intervening vessels  
 Avoidance of angulation of the endoscope
8. Is fluoroscopy essential for EUS guided pseudocyst drainage?  
a) Yes  
b) No  
c) Recommended
9. What is your choice of echoendoscope?  
a) Linear array echoendoscope  
b) Forward viewing echoendoscope
10. What is your choice of needle?  
a) 19G needle  
b) 19G access needle  
c) Giovanni needle  
d) Others: \_\_\_\_\_
11. What is your choice of wire and how many do you use?  
a)  0.035" or  0.025"  
b)  Single or  Double wire
12. What instruments do you use for tract dilation?  
(You can select more than one answer)  
 Tapered tip catheter  
 Cystotome  
 Needle-knife  
 CRE balloon
13. What is the size of dilation of the track?  
a)  $\leq 5$  mm  
b) 8 mm  
c) 10 mm  
d)  $> 10$  mm
14. Would you use plastic or metallic stents?  
a) Plastic:  
How many? \_\_\_\_\_  
b) Metallic  
Reasons for your choice? \_\_\_\_\_
15. Would you use transcystic catheters?  Yes  No
16. Do you admit the patients after the procedure?  Yes  No
17. How long would you keep the stents for?  
a) 1 month  
b) 3 months  
c) 6 months  
d) 12 months  
e)  $> 12$  months
18. What is the minimum number of procedures required to be performed before technical proficiency is obtained?  
a) 10  
b) 25  
c) 50  
d)  $> 50$
19. Is prior experience in ERCP required?  
a) Yes  
b) No  
c) Recommended
